# Supplementary material for: Hygroscopic Properties of Aminium Sulphate Aerosols
Source: Copernicus journal article supplement (doi:10.5194/acp-2016-959), 2016-11-01
Supplement: Supplementary file 1 [file acp-2016-959-supplement.pdf]

# Supplementary Information for: Hygroscopic Properties of Amminium Sulphate Aerosols

Grazia Rovelli<sup>1,2</sup>, Rachael E.H. Miles<sup>1</sup>, Jonathan P. Reid<sup>1</sup>, Simon L. Clegg<sup>3</sup>

<sup>1</sup> School of Chemistry, University of Bristol, Bristol, BS8 1TS, UK

5 <sup>2</sup> Department of Earth and Environmental Sciences, University of Milano-Bicocca, 20124 Milan, Italy

<sup>3</sup> School of Environmental Sciences, University of East Anglia, Norwich NR4 7TJ, UK

Correspondence to: Jonathan P. Reid ([j.p.reid@bristol.ac.uk](mailto:j.p.reid@bristol.ac.uk))

10

## Supplementary Information outline:

- **Table S1:** List and description of the uncertainties taken into account when calculating the hygroscopicity properties of aerosols from comparative kinetics experiments in a CK-EDB.
- 15 - **Table S2:** Measured densities and refractive indices of amminium sulphates solutions.
- **Table S3:** 3<sup>rd</sup> order polynomial fitted parameters for densities, calculated melt densities and melt refractive indices calculated with molar refraction mixing rule for the six considered amminium sulphates.
- **Table S4:** Comparison of pure melt densities from this work and from Clegg et al. (2013) and solid densities from Qiu and Zhang (2012).
- 20 - **Table S5:** Coefficients of the fitted equations of the measured apparent molar volumes.
- **Table S6:** Extended ZSR fitted coefficients at two fixed water activities ( $a_w$ , 0.80 and 0.925) for mixtures of amminium sulphate salts and sulphuric acid.
  
- **Figure S1:** Measured densities of amminium sulphates solutions and 3<sup>rd</sup> order polynomial fittings of data and measured refractive indices as a function of mass fraction and the corresponding molar refraction mixing rule fitting.
- 25 - **Figure S2:** Comparison of measured  $GF_r$  from CK-EDB experiments and  $GF_r$  data from H-TDMA measurements by Qiu and Zhang (2012)
- **Figure S3:** Measured and fitted apparent molar volumes of amminium sulphates in aqueous solutions from this work and from Clegg et al. (2013).

**Table S1:** List and description of the uncertainties taken into account when calculating the hygroscopicity properties of aerosols from comparative kinetics experiments in a CK-EDB.

| Quantity                           | Symbol/Formula                                            | Uncertainties                                                                                                                                                                                                                                                                                                                                                                                                                                                                                              |
|------------------------------------|-----------------------------------------------------------|------------------------------------------------------------------------------------------------------------------------------------------------------------------------------------------------------------------------------------------------------------------------------------------------------------------------------------------------------------------------------------------------------------------------------------------------------------------------------------------------------------|
| Water activity                     | $a_w$                                                     | <ul style="list-style-type: none"> <li>- <math>a_w</math>: uncertainty from RH determination in the EDB measurements (Davies et al., 2013):</li> <li>- RH&gt;80% (pure water used as a probe):<br/> <math display="block">RH = RH_w^{+(0.169RH_w^2 - 0.364RH_w + 0.194) - (-0.020RH_w + 0.021)}</math> </li> <li>- RH&lt;80% (NaCl used as a probe):<br/> <math display="block">RH = RH_{eq}^{+(-0.0175RH_{eq}^2 - 0.0005RH_{eq} + 0.017) - (-0.0266RH_{eq}^2 + 0.0086RH_{eq} + 0.017)}</math> </li> </ul> |
| Radial growth factor               | $GF_r = \frac{a}{a_{dry}}$                                | <ul style="list-style-type: none"> <li>- <math>a</math> (measured): <math>\pm 100</math> nm (Davies, 2014), &lt;1% for droplets bigger than 10 <math>\mu\text{m}</math>.<sup>(a)</sup></li> <li>- <math>a_{dry}</math>: uncertainty on the initial radius extrapolation at <math>t_0</math> (<math>a_{dry}^{+150\text{ nm}}_{-100\text{ nm}}</math>); uncertainty on the initial solution concentration.</li> </ul>                                                                                        |
| Mass fraction                      | $mfs = \frac{m_{solute}}{m_{tot}}$                        | <ul style="list-style-type: none"> <li>- <math>m_{solute}</math> (dry mass from the initial concentration): <math>a_{dry}^{+150\text{ nm}}_{-100\text{ nm}}</math>; uncertainty on the initial solution concentration.<sup>(b)</sup></li> <li>- <math>m_{tot}</math>: uncertainty from radius determination.</li> </ul>                                                                                                                                                                                    |
| Mole curves                        | $\frac{n_{water}}{n_{solute}}$                            | <ul style="list-style-type: none"> <li>- <math>n_{water}</math>, calculated from <math>m_{water} = m_{tot} - m_{solute}</math> (see uncertainties indicated above for <math>mfs</math>).</li> </ul>                                                                                                                                                                                                                                                                                                        |
| Stoichiometric osmotic coefficient | $\phi_{st} = \frac{-\ln(a_w)}{(m_{st} \cdot M_w / 1000)}$ | <ul style="list-style-type: none"> <li>- <math>m_{st}</math> (stoichiometric molality): uncertainties on <math>n_{solute}</math> and <math>m_{water}</math> (see uncertainties indicated for <math>mfs</math> and for <math>n_{water}/n_{solute}</math>).</li> </ul>                                                                                                                                                                                                                                       |

5 Symbols:  $a_w$ ; water activity;  $GF_r$  – radial growth factor;  $a$  – droplet radius;  $a_{dry}$  – dry particle radius;  $mfs$  – mass fraction of solute;  $m_{solute}$  – mass of solute in the particle;  $m_{tot}$  – total particle mass;  $n_{water}$  – moles of water;  $n_{solute}$  – moles of solute;  $\phi_{st}$  – stoichiometric osmotic coefficients;  $m_{st}$  – stoichiometric molality;  $M_w$  – molecular mass of water.

Notes:

- 5 (a) The optical phase function measurements in the CK-EDB used to estimate the size of a levitated droplet are taken at a wavelength of 532 nm; however, the wavelength dependence of refractive index was considered negligible (e.g. for pure water  $m=1.333$  at 589 nm and  $m=1.335$  at 532 nm) and introduced negligible error in the determination of droplet size when compared with other experimental uncertainties that must be accounted for (Rovelli et al., 2016).
- 10 (b) No uncertainties on the applied density parameterisations are taken into account. However, the sensitivity of the hygroscopic properties retrieved by means of CK-EDB measurements to potential uncertainties in the parameterisation of solution density have been evaluated in Section III.d of the main manuscript.

**Table S2:** Measured densities and refractive indices of aminium sulphates solutions.

| <b>MMAS</b> |            |                              |          |          |          | <b>MEAS</b> |            |                              |          |          |          |
|-------------|------------|------------------------------|----------|----------|----------|-------------|------------|------------------------------|----------|----------|----------|
| <i>mfs</i>  |            | $\rho$ (kg m <sup>-3</sup> ) |          | <i>m</i> |          | <i>mfs</i>  |            | $\rho$ (kg m <sup>-3</sup> ) |          | <i>m</i> |          |
|             |            | $\sigma$                     | $\sigma$ | $\sigma$ | $\sigma$ |             |            | $\sigma$                     | $\sigma$ |          |          |
| 0           | ± 0        | 998.1                        | 0        | 1.333    | -        | 0           | ± 0        | 998.2                        | 0.1      | 1.333    | -        |
| 0.0021      | ± 8.90E-06 | 999.0                        | 0.1      | 1.3334   | -        | 0.0073      | ± 3.00E-05 | 1000.6                       | 0.1      | 1.3342   | -        |
| 0.0070      | ± 3.00E-05 | 1001.4                       | 0.1      | 1.3342   | -        | 0.0129      | ± 5.30E-05 | 1002.8                       | 0.1      | 1.3350   | -        |
| 0.0178      | ± 0.0001   | 1006.3                       | 0.1      | 1.3359   | -        | 0.0345      | ± 0.0001   | 1010.6                       | 0.1      | 1.3382   | 5.77E-05 |
| 0.0406      | ± 0.0002   | 1016.8                       | 0        | 1.3394   | -        | 0.0776      | ± 0.0003   | 1026.1                       | 0        | 1.3444   | -        |
| 0.0675      | ± 0.0003   | 1028.8                       | 0.1      | 1.3436   | -        | 0.1393      | ± 0.0006   | 1047.3                       | 0.2      | 1.3531   | -        |
| 0.1061      | ± 0.0005   | 1045.8                       | 0.2      | 1.3494   | -        | 0.2087      | ± 0.0009   | 1071.1                       | 0.4      | 1.3632   | 5.77E-05 |
| 0.1487      | ± 0.0006   | 1064.8                       | 0.1      | 1.3561   | -        | 0.3097      | ± 0.0013   | 1107.1                       | 0.1      | 1.3778   | -        |
| 0.1995      | ± 0.0009   | 1087                         | 0        | 1.3638   | -        | 0.4178      | ± 0.0017   | 1144.2                       | 0.2      | 1.3934   | 1.15E-04 |
| 0.2579      | ± 0.0011   | 1111.5                       | 0.4      | 1.3724   | -        | 0.5295      | ± 0.0022   | 1180.6                       | 0.2      | 1.4091   | 5.77E-05 |
| 0.3002      | ± 0.0013   | 1127.6                       | 0.1      | 1.3778   | 5.77E-05 | 0.7687      | ± 0.0031   | 1247.6                       | 1.2      | 1.4413   | 2.00E-04 |
| 0.3657      | ± 0.0016   | 1154.7                       | 0.1      | 1.3872   | 5.77E-05 |             |            |                              |          |          |          |
| 0.4411      | ± 0.0019   | 1186.8                       | 1.2      | 1.3981   | -        |             |            |                              |          |          |          |
| 0.5482      | ± 0.0023   | 1231.3                       | 0.6      | 1.4145   | 1.53E-04 |             |            |                              |          |          |          |

  

| <b>DMAS</b> |          |                              |          |          |          | <b>DEAS</b> |            |                              |          |          |          |
|-------------|----------|------------------------------|----------|----------|----------|-------------|------------|------------------------------|----------|----------|----------|
| <i>mfs</i>  |          | $\rho$ (kg m <sup>-3</sup> ) |          | <i>m</i> |          | <i>mfs</i>  |            | $\rho$ (kg m <sup>-3</sup> ) |          | <i>m</i> |          |
|             |          | $\sigma$                     | $\sigma$ | $\sigma$ | $\sigma$ |             |            | $\sigma$                     | $\sigma$ |          |          |
| 0           | ± 0      | 998.5                        | 0.1      | 1.333    | -        | 0           | ± 0        | 998.1                        | 0.1      | 1.333    | -        |
| 0.0108      | ± 0.0001 | 1001.8                       | 0.1      | 1.3345   | -        | 0.0024      | ± 4.70E-05 | 998.3                        | 0.1      | 1.3335   | 5.77E-05 |
| 0.0643      | ± 0.0005 | 1019.1                       | 0.1      | 1.3421   | -        | 0.0124      | ± 2.50E-04 | 1000.5                       | 0.1      | 1.3347   | 5.77E-05 |
| 0.1232      | ± 0.0010 | 1037.6                       | 0.1      | 1.3502   | -        | 0.0291      | ± 0.0006   | 1004.1                       | 0.1      | 1.3371   | -        |
| 0.1742      | ± 0.0015 | 1052.9                       | 0.6      | 1.3573   | -        | 0.0690      | ± 0.0014   | 1012.7                       | 0.1      | 1.3426   | -        |
| 0.2351      | ± 0.0020 | 1071.9                       | 0.1      | 1.3657   | 1.53E-04 | 0.1126      | ± 0.0022   | 1026.7                       | 0.1      | 1.3518   | -        |
| 0.2956      | ± 0.0025 | 1088.9                       | 1.2      | 1.3737   | 2.65E-04 | 0.2094      | ± 0.0041   | 1043.3                       | 0.1      | 1.3629   | 1.15E-04 |
| 0.3557      | ± 0.0031 | 1104.3                       | 4.7      | 1.3823   | 2.00E-04 | 0.3061      | ± 0.0061   | 1064.9                       | 0.1      | 1.3773   | 5.77E-05 |
| 0.4082      | ± 0.0035 | 1124.5                       | 0.4      | 1.3898   | 5.77E-05 | 0.4292      | ± 0.0085   | 1092.2                       | 0.1      | 1.3962   | 1.15E-04 |
| 0.4699      | ± 0.0040 | 1143.4                       | 0.4      | 1.3985   | 5.77E-05 | 0.5622      | ± 0.0111   | 1117.3                       | 1.4      | 1.4152   | 9.87E-04 |
| 0.5330      | ± 0.0045 | 1156.0                       | 1.1      | 1.4067   | 1.15E-04 | 0.6667      | ± 0.0132   | 1134.5                       | 0.2      | 1.4309   | 4.16E-04 |

| TMAS       |                              |          |          |          | TEAS       |                              |                |          |          |        |          |
|------------|------------------------------|----------|----------|----------|------------|------------------------------|----------------|----------|----------|--------|----------|
| <i>mfs</i> | $\rho$ (kg m <sup>-3</sup> ) |          | <i>m</i> |          | <i>mfs</i> | $\rho$ (kg m <sup>-3</sup> ) |                | <i>m</i> |          |        |          |
|            | $\pm$                        | $\sigma$ | $\sigma$ | $\sigma$ |            | $\pm$                        | $\sigma$       | $\sigma$ | $\sigma$ |        |          |
| 0          | $\pm$ 0                      | 998.0    | 0.1      | 1.333    | 0          | $\pm$ 0                      | 998.0          | 0.2      | 1.333    |        |          |
| 0.0017     | $\pm$ 1.70E-05               | 998.5    | 0        | 1.3334   | -          | 0.0025                       | $\pm$ 3.20E-04 | 998.5    | 0.1      | 1.3336 | -        |
| 0.0039     | $\pm$ 3.70E-05               | 999.2    | 0.1      | 1.3336   | -          | 0.0129                       | $\pm$ 7.30E-04 | 1001.3   | 0.1      | 1.3354 | 5.77E-05 |
| 0.0109     | $\pm$ 0.0001                 | 1001.2   | 0.1      | 1.3346   | -          | 0.0335                       | $\pm$ 0.0012   | 1006.9   | 0.2      | 1.3392 | -        |
| 0.0197     | $\pm$ 0.0002                 | 1003.5   | 0.1      | 1.3359   | -          | 0.0637                       | $\pm$ 0.0016   | 1014.9   | 0.2      | 1.3447 | -        |
| 0.0331     | $\pm$ 0.0003                 | 1007.3   | 0.1      | 1.3378   | -          | 0.1236                       | $\pm$ 0.0023   | 1030.8   | 0.1      | 1.3558 | -        |
| 0.0515     | $\pm$ 0.0005                 | 1012.1   | 0.2      | 1.3404   | -          | 0.1884                       | $\pm$ 0.0028   | 1048.9   | 0.1      | 1.3683 | 1.53E-04 |
| 0.0786     | $\pm$ 0.0007                 | 1019.4   | 0.1      | 1.3444   | -          | 0.2747                       | $\pm$ 0.0034   | 1075.1   | 0.1      | 1.3864 | -        |
| 0.1027     | $\pm$ 0.0010                 | 1025.7   | 0.1      | 1.3477   | 5.77E-05   | 0.3807                       | $\pm$ 0.0040   | 1104.8   | 1.2      | 1.4082 | 1.00E-04 |
| 0.1303     | $\pm$ 0.0012                 | 1032.9   | 0.1      | 1.3517   | -          | 0.4999                       | $\pm$ 0.0046   | 1135.6   | 1.6      | 1.4298 | 1.18E-03 |
| 0.1450     | $\pm$ 0.0014                 | 1036.8   | 0.1      | 1.3539   | 5.77E-05   | 0.6008                       | $\pm$ 0.0050   | 1158.2   | 1.8      | 1.4480 | 4.54E-03 |
| 0.1828     | $\pm$ 0.0017                 | 1046.6   | 0.2      | 1.3593   | 5.77E-05   |                              |                |          |          |        |          |
| 0.2104     | $\pm$ 0.0020                 | 1053.4   | 0.1      | 1.3634   | -          |                              |                |          |          |        |          |
| 0.2557     | $\pm$ 0.0024                 | 1065.3   | 0.1      | 1.3701   | -          |                              |                |          |          |        |          |
| 0.3074     | $\pm$ 0.0029                 | 1078.6   | 0.2      | 1.3778   | 5.77E-05   |                              |                |          |          |        |          |
| 0.3638     | $\pm$ 0.0035                 | 1094.0   | 0.2      | 1.3864   | -          |                              |                |          |          |        |          |
| 0.4580     | $\pm$ 0.0044                 | 1118.1   | 1.6      | 1.4006   | 1.53E-04   |                              |                |          |          |        |          |

Symbols: *mfs* – mass fraction of solute;  $\rho$  – measured density of solution; *m* – measured refractive index of solution;  $\sigma$  – standard deviation arising from the averaging of three repeated measurements.

**Table S3:** 3<sup>rd</sup> order polynomial fitted parameters for densities ( $\rho$ ), calculated melt densities ( $\rho_{melt}$ ) and melt refractive indices ( $m_{melt}$ ) calculated with molar refraction mixing rule for the six considered aminium sulphates.

|      | $a_0$  | $a_1$  | $a_2$  | $a_3$   | $\rho_{melt}$<br>( $kg\ m^{-3}$ ) | $m_{melt}$ |
|------|--------|--------|--------|---------|-----------------------------------|------------|
| MMAS | 998.10 | 5.12   | 447.11 | -40.19  | 1410.1                            | 1.4771     |
| DMAS | 998.47 | -2.55  | 341.03 | -51.91  | 1285.0                            | 1.4725     |
| TMAS | 998.03 | 4.64   | 252.17 | 4.82    | 1259.7                            | 1.4921     |
| MEAS | 998.17 | -19.25 | 459.22 | -127.00 | 1311.1                            | 1.4708     |
| DEAS | 998.10 | -10.09 | 285.60 | -82.47  | 1191.1                            | 1.4810     |
| TEAS | 998.50 | -25.09 | 378.58 | -100.86 | 1251.1                            | 1.5357     |

### Parameterisations used:

3<sup>rd</sup> order polynomial parameterization for densities ( $\rho$ ) as a function of the square-rooted mass fraction ( $mfs$ ) of solute:

$$\rho = a_0 + a_1(mfs^{0.5}) + a_2(mfs) + a_3(mfs^{1.5}) \quad \text{Eq. S1}$$

Molar refraction mixing rule for the representation of the refractive index ( $m$ ) of a solution. The molar refraction ( $R$ ) of a species is defined as (Liu and Daum, 2008):

$$R = \frac{(m^2-1)M}{(m^2+2)\rho} \quad \text{Eq. S2}$$

where  $M$  is the compound's molecular mass and  $\rho$  is its pure density (melt density in case of a solute, pure liquid density in the case of the solvent, i.e. water). The molar refraction for a mixture of different components is defined as the sum of the molar refractions of each compound ( $i$ ) weighted by their mole fractions ( $x_i$ ):

$$R = \sum_i x_i R_i \quad \text{Eq. S3}$$

Therefore, in the case of a binary solution composed of water and a generic solute:

$$\frac{(m_{solution}^2-1)M_{solution}}{(m_{solution}^2+2)\rho_{solution}} = x_{H_2O} \frac{(m_{H_2O}^2-1)M_{H_2O}}{(m_{H_2O}^2+2)\rho_{H_2O}} + x_{solute} \frac{(m_{melt}^2-1)M_{solute}}{(m_{melt}^2+2)\rho_{melt}} \quad \text{Eq. S4}$$

where  $m_{solution}$  and  $\rho_{solution}$  are measured,  $M_{solution}$  is calculated as  $M_{solution} = \sum_i x_i M_i$  (Liu and Daum, 2008), the mole fractions of water and solute are known from the concentration of the prepared solution, density and refractive index of pure water are known,  $\rho_{melt}$  is calculated from the density parameterisation at  $mfs=1$ . Therefore, the only unknown is  $m_{melt}$  and a least squares fit of the experimental refractive index data is performed with Eq. S4 to calculate it.

When correcting the obtained radius vs. time data from CK-EDB experiments, the iterative procedure proposed in a previous work (Davies et al., 2012) is applied, but the variation in refracting index with the variation of the solution concentration is calculated with the molar refraction mixing rule.

**Table S4:** Comparison of pure melt densities ( $\rho_{melt}$ ) from this work and from Clegg et al. (2013) and solid densities ( $\rho_{solid}$ ) from Qiu and Zhang (2012).

| <b>Compound</b> | <b><math>\rho_{melt}</math> (this work)</b> | <b><math>\rho_{melt}</math></b>               | <b><math>\rho_{solid}</math></b>               |
|-----------------|---------------------------------------------|-----------------------------------------------|------------------------------------------------|
|                 | (g cm <sup>-3</sup> )                       | (Clegg et al., 2013)<br>(g cm <sup>-3</sup> ) | (Qiu and Zhang, 2012)<br>(g cm <sup>-3</sup> ) |
| MMAS            | 1.410                                       | 1.451 ( $\pm 0.0029$ )                        | 1.485 $\pm$ 0.089                              |
| DMAS            | 1.285                                       | 1.278 ( $\pm 0.0022$ )                        | 1.408 $\pm$ 0.084                              |
| TMAS            | 1.259                                       | 1.289 ( $\pm 0.0031$ )                        | 1.342 $\pm$ 0.081                              |
| MEAS            | 1.311                                       | -                                             | -                                              |
| DEAS            | 1.191                                       | 1.212 ( $\pm 0.0030$ )                        | 1.268 $\pm$ 0.076                              |
| TEAS            | 1.251                                       | 1.190 ( $\pm 0.0018$ )                        | 1.247 $\pm$ 0.075                              |

**Table S5:** Values of the coefficients of the fitted equations of measured apparent molar volumes ( $V^\phi$ ) of aminium sulphates in aqueous solutions (displayed in Figure S3). The used fitting equation is the same used by Clegg et al. (2013):

$$V^\phi = V^{\phi\infty} + a_1 \cdot (wt\%)^{0.5} + a_2 \cdot (wt\%)^{0.75} + a_3 \cdot (wt\%) + a_4 \cdot (wt\%)^{1.5}$$

where  $V^{\phi\infty}$  is the apparent molar volume of the aminium salt taken from literature (as in Clegg et al.) and  $wt\%$  is the weight percentage of salt in solution. Note that the fitted equation is constrained at  $wt\% = 0$  to the  $V^{\phi\infty}$  literature value.

|      | $V^{\phi\infty}$ | $a_1$           | $a_2$         | $a_3$          | $a_4$             |
|------|------------------|-----------------|---------------|----------------|-------------------|
| MMAS | 86.27            | -0.542 ± 0.276  | 0             | 0.792 ± 0.099  | -0.0507 ± 0.00882 |
| DMAS | 123.83           | 2.039 ± 0.150   | 0             | 0              | 0.00266 ± 0.00367 |
| TMAS | 159.47           | -8.051 ± 0.962  | 6.866 ± 0.883 | -1.318 ± 0.201 | 0                 |
| MEAS | 120.8            | -1.043 ± 0.238  | 1.062 ± 0.088 | 0              | 0                 |
| DEAS | 191.91           | 0               | 0             | 0.115 ± 0.009  | 0                 |
| TEAS | 256.16           | -22.759 ± 1.264 | 7.080 ± 0.495 | 0              | 0                 |



**Table S6:** Extended ZSR fitted coefficients (Eq. 3 in Sauerwein et al. (2015)) at two fixed water activities ( $a_w$ , 0.80 and 0.925) for mixtures of aminium sulphate salts and sulphuric acid, as in Figure 7 in the main manuscript. The coefficients refer to the ZSR fitting of data from Sauerwein et al. (2016) together with the CK-EDB datapoint (red dashed lines in Figure 7 in the main manuscript). Symbols:  $w^o_a$  – water associated to  $H_2SO_4$  in an aqueous solution at the same water activity as the mixture;  $w^o_{as}$  – water associated to the aminium salt in an aqueous solution at the same water activity as the mixture;  $A^o$  – fitted empirical parameter.

| $a_w = 0.80$  |         |            |   |        |         |          |
|---------------|---------|------------|---|--------|---------|----------|
|               | $w^o_a$ | $w^o_{as}$ |   |        | $A^o$   |          |
| MMAS          | 0.2682  | 0.2501     | ± | 0.0092 | -0.3218 | ± 0.0447 |
| DMAS          | 0.2682  | 0.3072     | ± | 0.0047 | -0.4272 | ± 0.0240 |
| TMAS          | 0.2682  | 0.3782     | ± | 0.0112 | -0.6147 | ± 0.0388 |
| MEAS          | 0.2682  | 0.2747     | ± | 0.0076 | -0.3733 | ± 0.0256 |
| DEAS          | 0.2682  | 0.3299     | ± | 0.0195 | -0.4655 | ± 0.0882 |
| $a_w = 0.925$ |         |            |   |        |         |          |
|               | $w^o_a$ | $w^o_{as}$ |   |        | $A^o$   |          |
| MMAS          | 0.5641  | 0.6035     | ± | 0.0194 | -0.6155 | ± 0.0934 |
| DMAS          | 0.5641  | 0.6997     | ± | 0.0248 | -0.7095 | ± 0.1273 |
| TMAS          | 0.5641  | 0.8143     | ± | 0.0215 | -1.0166 | ± 0.0749 |
| MEAS          | 0.5641  | 0.6587     | ± | 0.0140 | -0.6166 | ± 0.0476 |
| DEAS          | 0.5641  | 0.8472     | ± | 0.0325 | -1.0603 | ± 0.1233 |

**Figure S1:** Measured densities of aminium sulphates solutions and 3<sup>rd</sup> order polynomial fittings of data (Panel A). Measured refractive indices as a function of mass fraction and the corresponding molar refraction mixing rule fitting (Panel B).

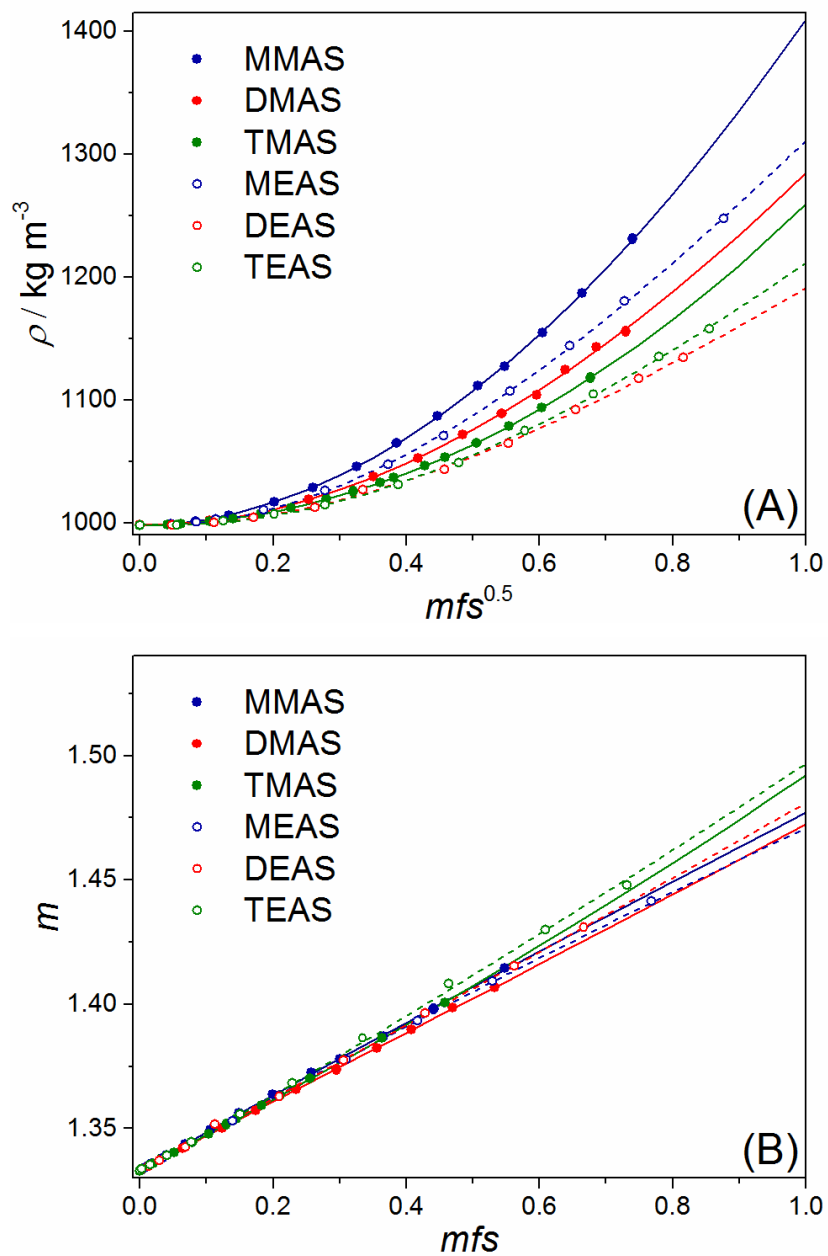

**Figure S2:** Comparison of measured  $GF_r$  from CK-EDB experiments and  $GF_r$  data from H-TDMA measurements by Qiu and Zhang (2012).

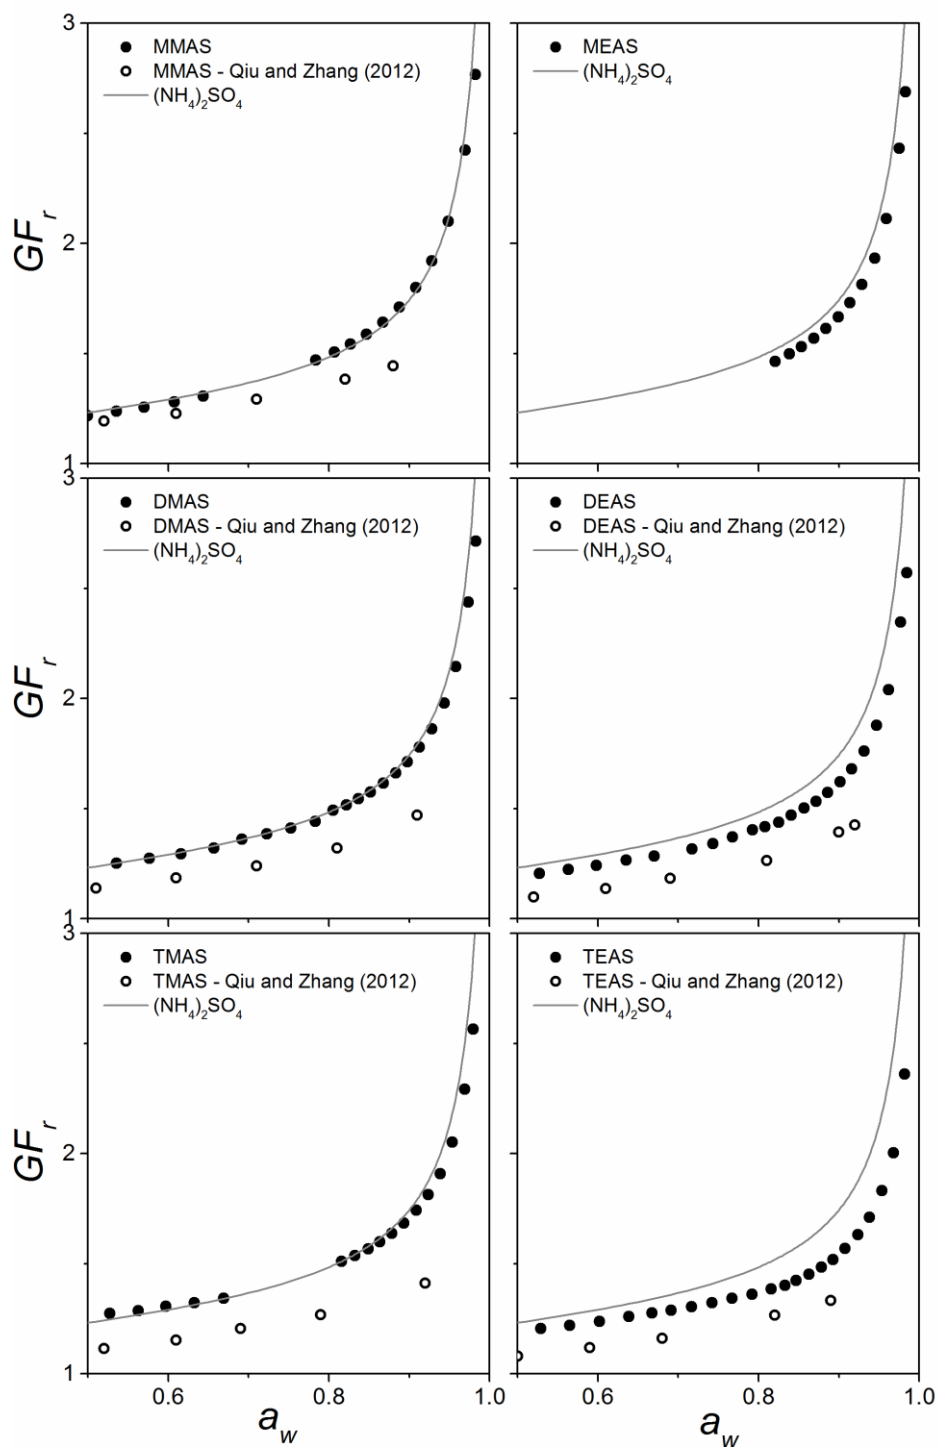

**Figure S3:** Apparent molar volumes ( $V^\phi$ ) of aminium sulphates in aqueous solutions as a function of the square root of the solute weight percentage ( $wt\%$ ). Symbols: black diamonds – measured values, this work; black line – fitted equations (coefficients in Table S5); grey dots – measured values by Clegg et al. (2013); grey lines – fitted equations of measured data in Clegg et al. (2013); dashed lines – uncertainty on apparent molar volumes when a  $\pm 0.001 \text{ g cm}^{-3}$  uncertainty on the measured density is considered; open circles – apparent molar volumes at infinite dilutions from literature (as in Fig. 1 in Clegg et al. (2013)).

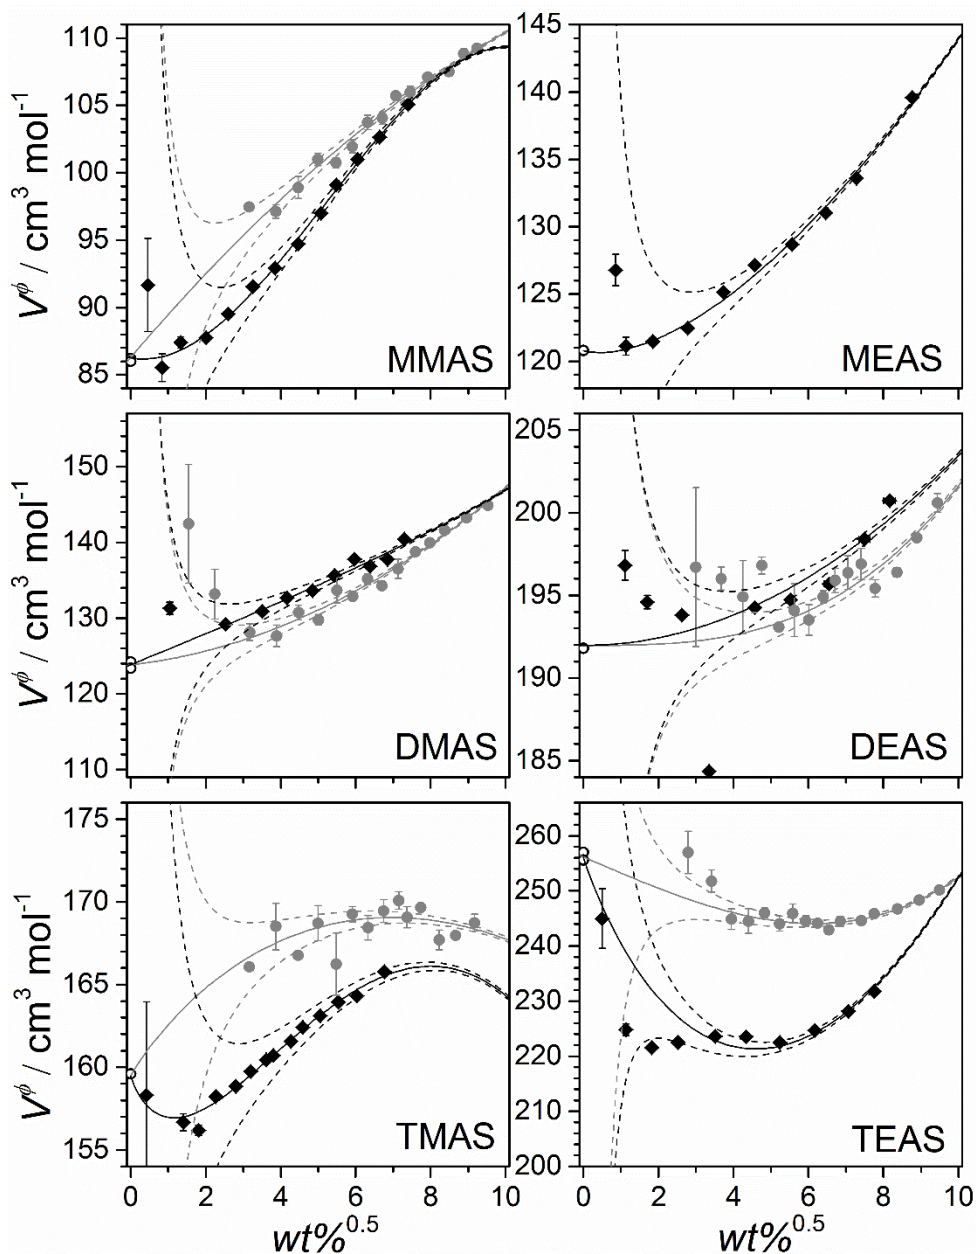

## References

- Clegg, S. L., Qiu, C. and Zhang, R.: The deliquescence behaviour, solubilities, and densities of aqueous solutions of five methyl- and ethyl-aminium sulphate salts, *Atmos. Environ.*, 73, 145–158, doi:10.1016/j.atmosenv.2013.02.036, 2013.
- 5 Davies, J. F.: *Characterising The Impact Of Bulk, Surface And Gas-Phase Limitations On Mass Transport In Aerosol.*, 2014.
- Davies, J. F., Haddrell, A. E. and Reid, J. P.: Time-Resolved Measurements of the Evaporation of Volatile Components from Single Aerosol Droplets, *Aerosol Sci. Technol.*, 46(6), 666–677, doi:10.1080/02786826.2011.652750, 2012.
- Davies, J. F., Haddrell, A. E., Rickards, A. M. J. and Reid, J. P.: Simultaneous analysis of the equilibrium hygroscopicity and water transport kinetics of liquid aerosol, *Anal. Chem.*, 85(12), 5819–5826, doi:10.1021/ac4005502, 2013.
- 10 Liu, Y. and Daum, P. H.: Relationship of refractive index to mass density and self-consistency of mixing rules for multicomponent mixtures like ambient aerosols, *J. Aerosol Sci.*, 39(11), 974–986, doi:10.1016/j.jaerosci.2008.06.006, 2008.
- Qiu, C. and Zhang, R.: Physiochemical properties of alkylaminium sulfates: Hygroscopicity, thermostability, and density, *Environ. Sci. Technol.*, 46(8), 4474–4480, doi:10.1021/es3004377, 2012.
- 15 Rovelli, G., Miles, R. E. H., Reid, J. P. and Clegg, S. L.: Accurate Measurements of Aerosol Hygroscopic Growth Over a Wide Range in Relative Humidity, *J. Phys. Chem. A*, 120, 4376–4388, doi:10.1021/acs.jpca.6b04194, 2016.
- Sauerwein, M., Clegg, S. L. and Chan, C. K.: Water Activities and Osmotic Coefficients of Aqueous Solutions of Five Alkylaminium Sulfates and Their Mixtures with H<sub>2</sub>SO<sub>4</sub> at 25°C, *Aerosol Sci. Technol.*, 49(8), 566–579, doi:10.1080/02786826.2015.1043045, 2015.
